1 **Typical retinotopic locations impact the time course of object coding**

2

3 Daniel Kaiser<sup>1,\*</sup>, Merle M. Moeskops<sup>1</sup>, Radoslaw M. Cichy<sup>1,2,3</sup>

4

5 <sup>1</sup>*Department of Education and Psychology, Freie Universität Berlin, Berlin, Germany*

6 <sup>2</sup>*Berlin School of Mind and Brain, Humboldt-Universität Berlin, Berlin, Germany*

7 <sup>3</sup>*Bernstein Center for Computational Neuroscience Berlin, Berlin, Germany*

8

9 \*Correspondence to:

10 Dr. Daniel Kaiser

11 Department of Education and Psychology

12 Freie Universität Berlin

13 Habelschwerdter Allee 45

14 14195 Berlin, Germany

15 [danielkaiser.net@gmail.com](mailto:danielkaiser.net@gmail.com)

16 **Abstract**

17 In everyday visual environments, objects are non-uniformly distributed across visual  
18 space. Many objects preferentially occupy particular retinotopic locations: for example,  
19 lamps more often fall into the upper visual field, whereas carpets more often fall into the  
20 lower visual field. The long-term experience with natural environments prompts the  
21 hypothesis that the visual system is tuned to such retinotopic object locations. A key  
22 prediction is that typically positioned objects should be coded more efficiently. To test  
23 this prediction, we recorded electroencephalography (EEG) while participants viewed  
24 briefly presented objects appearing in their typical locations (e.g., an airplane in the upper  
25 visual field) or in atypical locations (e.g., an airplane in the lower visual field). Multivariate  
26 pattern analysis applied to the EEG data revealed that object classification depended on  
27 positional regularities: Objects were classified more accurately when positioned typically,  
28 rather than atypically, already at 140 ms, suggesting that relatively early stages of object  
29 processing are tuned to typical retinotopic locations. Our results confirm the prediction  
30 that long-term experience with objects occurring at specific locations leads to enhanced  
31 perceptual processing when these objects appear in their typical locations. This may  
32 indicate a neural mechanism for efficient natural scene processing, where a large number  
33 of typically positioned objects needs to be processed.

34

35 **Keywords**

36 visual perception, object recognition, real-world regularities, location priors, EEG  
37 decoding, multivariate pattern analysis

## 38 **1 Introduction**

39 Visual objects are enclosed entities that can in principle be moved around freely.  
40 However, in everyday environments object positions are often quite constrained. For  
41 instance, consider the predictability in the locations of objects in a living room: The sofa is  
42 facing the TV, a table is in between the two, a lamp hangs from the ceiling, whereas  
43 carpets lie on the floor. This example illustrates that the object content of natural scenes  
44 is organized in repeatedly occurring positional structures (Bar, 2000; Chun, 2002). Many  
45 previous studies have investigated how inter-object relationships in these positional  
46 structures (e.g., lamps appearing above tables) impact behavioral performance and  
47 neural processing (Biederman, Mezzanotte, & Rabinowitz, 1982; Kaiser, Stein, & Peelen,  
48 2014; Oliva & Torralba, 2007; Wolfe, Võ, Evans, & Greene, 2011). However, positional  
49 object structures often also imply that individual objects are associated with particular  
50 locations in space (e.g., lamps appearing in the upper part of a scene). It has recently  
51 been proposed that the visual system is tuned to these regularities (Kaiser & Haselhuhn,  
52 2017; Kravitz, Vinson, & Baker, 2008), which could facilitate neural processing for  
53 individual objects appearing in retinotopic locations that correspond to their typical real-  
54 world locations.

55       Such location-specific variations in object coding are suggested by previous results  
56 that indicate the co-representation of object identity and location information in visual  
57 cortex: (1) cortical responses depend on the position of the object in the visual field  
58 (Hemond, Kanwisher, & Op de Beeck, 2007; Hasson, Levy, Behrmann, Hendler, & Malach,  
59 2002), (2) object selective cortex contains information about both an object's identity and  
60 its location (Cichy, Chen, & Haynes, 2011; Golomb & Kanwisher, 2011; Hong, Yamins, Majaj,  
61 & DiCarlo, 2017; Kravitz, Kriegeskorte, & Baker, 2010; Schwarzlose, Swisher, Dang, &

62 Kanwisher, 2008), and (3) information about object identity and location emerge at  
63 similar time points in visual processing (Isik, Meyers, Leibo, & Poggio, 2014; Carlson,  
64 Hogendoorn, Kanai, Mesik, & Turret, 2011).

65         The link between identity and location information in object processing creates  
66 the possibility that the two properties interact. In everyday environments, the visual  
67 system is repeatedly faced with positional structures, where individual object positions  
68 are highly predictable. Under typical viewing conditions, and unless directly fixated,  
69 objects appearing in the upper part of scenes also more often occupy locations in the  
70 upper visual field, while objects appearing in the lower part of scenes are repeatedly  
71 encountered in the lower visual field. Through repeated exposure, retinotopic object-  
72 coding mechanisms could get tuned to typical object locations in the visual field. Thus,  
73 over time, neural channels are shaped to represent typical object-location conjunctions in  
74 a maximally efficient way. These efficient location-specific object representations would  
75 enhance the processing of an object when it appears in its typical locations within a scene  
76 – and within the visual field. Evidence for such a processing enhancement has been found  
77 in the domain of person perception, where typical configurations impact cortical  
78 responses to individual face and body parts (Chan, Kravitz, Truong, Arizpe, & Baker, 2010;  
79 de Haas et al., 2016; Henriksson, Mur, & Kriegeskorte, 2015). For example, in face-selective  
80 visual cortex, response patterns are better discriminable for typically, as compared to  
81 atypically, positioned face parts (de Haas et al., 2016), revealing visual processing  
82 channels that are tuned to the spatial regularities in the face.

83         Here, we test the prediction that the positional regularities contained in natural  
84 scenes can similarly facilitate the processing of everyday objects appearing in their typical  
85 retinotopic locations. Participants viewed objects associated with upper and lower visual

86 field locations (e.g., a lamp or a carpet) (Figure 1A) while we recorded  
87 electroencephalography (EEG). We used multivariate classification on the EEG data  
88 (Contini, Wardle, & Carlson, 2017) to track the time course of object coding with high  
89 temporal precision. Analyses revealed that after 140ms the visual processing of an object  
90 is affected by its typical location in the visual field: Objects appearing in their typical  
91 locations (e.g., a lamp in the upper visual field and a carpet in the lower visual field) could  
92 be decoded more successfully than objects appearing in atypical locations (e.g., a carpet  
93 in the upper visual field and a lamp in the lower visual field). These results suggest that  
94 early stages of visual processing are tuned to the positional object structure of real-world  
95 scenes.

## 96 **2 Materials and Methods**

### 97 *2.1 Participants*

98 Thirty-four healthy adults (mean age 26.4 years,  $SD = 5.4$ ; 23 female) completed  
99 the experiment. The sample size was set a-priori, based on considerations regarding  
100 statistical power: A sample size of 34 is needed for detecting a simple effect with a  
101 medium effect size of  $d = 0.5$  with a probability of more than 80%. All participants had  
102 normal or corrected-to-normal vision, provided informed consent and received monetary  
103 reimbursement or course credits for their participation. All procedures were approved by  
104 the ethical committee of the Department of Education and Psychology of the Freie  
105 Universität Berlin and were in accordance with the Declaration of Helsinki.

### 106 *2.2 Stimuli*

107 The stimulus set consisted of greyscale images of six objects associated with typical visual  
108 field locations, of which three were associated with upper visual field locations (lamp,  
109 airplane, and hat) and three were associated with lower visual field locations (carpet,  
110 boat, and shoe). For each object, ten exemplars were used (see Figure 1A for stimulus  
111 examples). To avoid a confounding of visual field associations and other, conceptual  
112 stimulus attributes, the objects were matched for their categorical content (two furniture  
113 items, two transportation items, and two clothing items), so that high-level properties  
114 like the objects' size, manipulability and semantic associations were comparable across  
115 upper and lower visual field objects. To control for low-level visual factors, all stimulus  
116 images were gray-scaled and matched for overall luminance (using the SHINE toolbox;  
117 Willenbockel et al., 2010). Additionally, as a measure of low-level image similarity, pixel-  
118 wise similarity was computed between all 60 images (i.e., 6 objects, 10 exemplars each),  
119 in a pairwise fashion: Pixel intensity values were correlated between all same visual field

120 objects (e.g., lamps and airplanes) and between all different visual field objects (e.g.,  
121 lamps and boats). No difference between all possible (600) within-field and all possible  
122 (900) between-field correlations emerged,  $t(1498)=0.50$ ,  $p=0.62$ , indicating that objects  
123 with identical typical locations were no more similar in their low-level visual properties  
124 than objects with different typical locations.

125 To ensure that the six objects could be reliably linked to a specific location, we  
126 validated the association of the six objects with a specific part of the visual field in two  
127 ways. First, we assessed the typical spatial distribution of each object in natural scenes,  
128 assuming that natural scene photographs represent a snapshot of the visual field roughly  
129 approximating natural viewing conditions. Hence, the distribution of the objects in the  
130 scene image should be similar to their distribution across the visual field. To objectively  
131 measure the typical position of each object within a scene, we queried a huge number of  
132 scene photographs (>100,000) from the LabelMe toolbox, where human observers  
133 annotated single objects by drawing labelled polygons (Russell, Torralba, Murphy, &  
134 Freeman, 2008). For all scenes containing a specific object we computed the mean pixel  
135 coordinate of the area labeled as belonging to the object and then averaged these  
136 positions across scenes. The resulting “typical” object locations showed that, as  
137 expected, the upper visual field objects were associated with locations ( $y$ : vertical  
138 coordinate from bottom (0) to top (1) of the scene) in the upper parts of scenes (lamp:  $y$   
139 = 0.61,  $SD = 0.17$ ; airplane:  $y = 0.52$ ,  $SD = 0.20$ ; hat:  $y = 0.60$ ,  $SD = 0.18$ ), while lower visual  
140 field objects were associated with locations in the lower part of scenes (carpet:  $y = 0.17$ ,  
141  $SD = 0.13$ ; boat:  $y = 0.42$ ,  $SD = 0.18$ ; shoe:  $y = 0.37$ ,  $SD = 0.17$ ). The typical location in scenes  
142 differed significantly between objects associated with the upper and lower visual field,  $t >$

143 11.4,  $p < .001$ , for all pairwise comparisons. Figure 1B shows the distribution of object  
144 locations along the vertical axis of the scenes, split into 7 bins.

145         Second, we sought to demonstrate a correspondence between this automated,  
146 scene-based measure and people's explicit associations of the objects with particular  
147 locations in space. We thus asked a set of participants ( $n = 70$  for lamp/carpet,  $n = 60$  for  
148 airplane/boat,  $n = 65$  for hat/shoe; including the participants of the current study, after  
149 the completion of the EEG experiment) to indicate the typical locations in which they  
150 expect to see each of the six objects. In this task, participants were asked to drag the  
151 image of a single exemplar of each object to its typical location on a computer screen  
152 (imagining that the computer screen represents their field of view in a natural scene). The  
153 central part of the screen – where the object initially appeared – was blocked (indicated  
154 by a grey circle), so that participants (1) could not place the object in a central location of  
155 the screen, and (2) had to move the object before proceeding. As expected, participants  
156 more often chose upper screen positions ( $y$ : vertical coordinate from bottom (0) to top  
157 (1) of the screen) for the upper visual field objects (lamp:  $y = 0.65$ ,  $SD = 0.19$ ; airplane:  $y =$   
158  $0.67$ ,  $SD = 0.20$ ; hat:  $y = 0.57$ ,  $SD = 0.20$ ), and lower screen positions for the lower visual  
159 field objects (carpet:  $y = 0.29$ ,  $SD = 0.22$ ; boat:  $y = 0.36$ ,  $SD = 0.18$ ; shoe:  $y = 0.30$ ,  $SD = 0.18$ ).  
160 The vertical locations chosen by the participants differed significantly between objects  
161 associated with the upper and lower visual field,  $t > 6.04$ ,  $p < .001$ , for all pairwise  
162 comparisons. Figure 1C shows the distribution of vertical object locations on the screen,  
163 split into 7 bins. The scene-based measure and participants' explicit assessment thus  
164 provided converging evidence for the association of the objects with specific spatial  
165 locations.

166



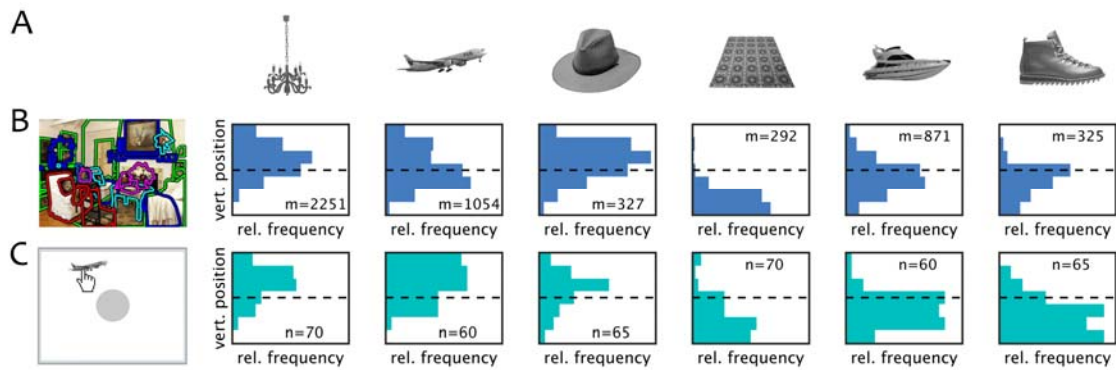

167

168 **Figure 1.** A) Example Stimuli. Ten different exemplar images of six objects each (here, one  
169 example image for each object shown) were used as stimuli, of which three objects were  
170 associated with the upper visual field (lamp, airplane, hat) and three were associated  
171 with the lower visual field (carpet, boat, shoe). B) To validate our assessment of visual  
172 field associations, we automatically extracted the positions for each object in a large set  
173 of labelled scene photographs taken from the LabelMe scene database (Russell et al.,  
174 2008). For each scene, we determined the relative position of the object along the  
175 vertical axis, and plotted the distribution across 7 bins ( $m$ : number of scenes for each  
176 object). C) Additionally, we asked a group of participants to indicate for each object the  
177 position that it typically occupies in the visual field by dragging the object to the desired  
178 location. We then computed the distribution of relative locations along the vertical axis of  
179 the screen, split into 7 bins ( $n$ : number of participants that indicated the typical location  
180 for each object). Both measures confirmed the spatial priors associated with the six  
181 objects.

182

### 183 2.3 Experimental Design

184 To test whether objects are processed differently when presented in typical and  
185 atypical locations within the visual field, the objects were presented in the upper or lower  
186 visual field (Figure 2A). On every trial, one object exemplar was presented in one of the

187 two locations for 150ms, followed by a variable inter-trial interval (randomly jittered, from  
188 1250ms to 1750ms). The brief presentation time was chosen to not give participants  
189 enough time to move their eyes towards the objects. Stimuli were presented at 3.25°  
190 vertical eccentricity and subtended a visual angle of maximally 3° in horizontal and vertical  
191 axes. Stimulus presentation was controlled using the Psychtoolbox (Brainard, 1997).  
192 Participants were asked to detect one-back repetitions on an object level (e.g., two  
193 different airplanes in direct succession; see Figure 2A). Repetitions occurred on 13% of the  
194 trials and equally often for typically and atypically positioned repetition targets and for  
195 the top and bottom locations. Participants performed accurately on this task (mean  
196 accuracy 96%,  $SD = 2\%$ ), with no difference in accuracy between typically and atypically  
197 positioned objects,  $t(33) = 0.87, p = .391$ . One-back repetition trials (i.e., the “second” trial  
198 containing the repetition) were removed from all EEG analyses. The whole experiment  
199 consisted of 1656 trials: in 1440 trials, each object exemplar was shown 12 times in each  
200 location (i.e., 120 repetitions per object and location), while the remaining 216 trials were  
201 one-back repetition trials. The experiment was split into 8 runs, and participants could  
202 take breaks between the runs. Twelve participants completed an extended experimental  
203 session with 2760 trials (including 360 repetition trials), which additionally contained the  
204 same conditions at large eccentricities in half of the trials; these additional data are not  
205 reported here. The 2400 non-repetition trials consisted of 10 repetitions of each object  
206 exemplar in each of the four locations (i.e., 100 repetitions per object and location). The  
207 extended experiment was split into 12 runs.  
208

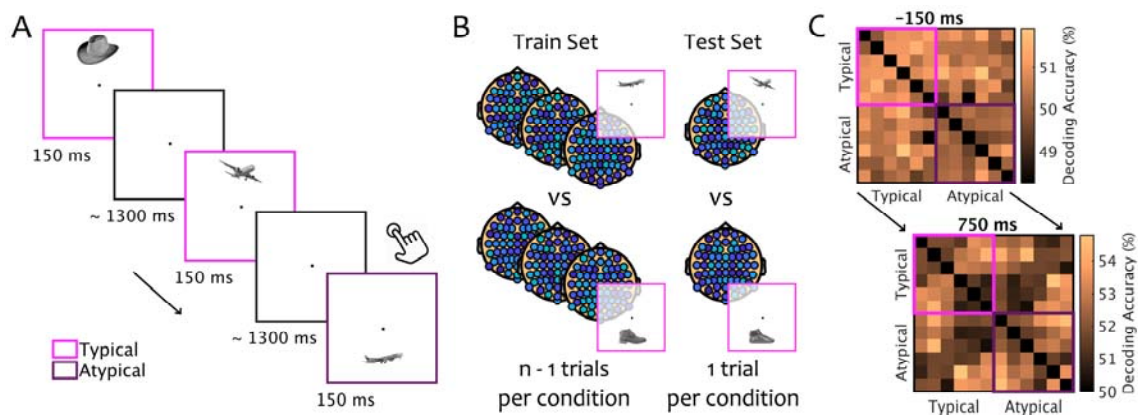

209

210 **Figure 2.** Paradigm and Classification Logic. A) Stimuli were presented for 150 ms in upper  
211 or lower visual field locations, corresponding to an object's typical or an atypical location.  
212 Participants were instructed to detect occasional one-back repetitions on an object-level  
213 (e.g., two airplanes in a row; irrespective of the stimulus location) by pressing a button.  
214 Colors indicating the two regularity conditions are shown for illustrative purposes only. B)  
215 Multivariate classification was performed on response patterns across all electrodes,  
216 separately for each pairwise combination of objects (exemplified here by airplane and  
217 shoe in regular locations). The data was split into two sets: a training set consisting of all  
218 (but one) trials for each object and a testing set consisting of the two left-out trials. LDA  
219 classifiers were repeatedly trained and tested until every trial was left out once and  
220 accuracy was averaged across these repetitions. C) The pairwise classification analysis  
221 was repeated for each 10 ms time bin, resulting in a 12-by-12 matrix of pairwise  
222 classification accuracies (with an empty diagonal) at every time point. To determine  
223 differences between typically and atypically positioned objects, pairwise comparisons  
224 within the typically placed objects (pink rectangle, upper left) and within the atypically  
225 placed objects (purple rectangle, lower right) were averaged and compared (Figure 3).

226

227 *2.4 EEG recording and preprocessing*

228 The EEG was recorded using an EASYCAP 64-channel system and a Brainvision  
229 actiCHamp amplifier. The 64 electrodes were arranged in accordance with the standard  
230 10-10 system. The data was recorded at a sampling rate of 1000 Hz and filtered online  
231 between 0.5 and 70 Hz. For one participant, due to a technical problem, only data from 32  
232 electrodes was recorded. All electrodes were referenced online to the Fz electrode.  
233 Offline preprocessing was performed in MATLAB, using the FieldTrip toolbox  
234 (Oostenveld, Fries, Maris, & Schoffelen, 2011). The continuous EEG data was epoched into  
235 trials ranging from 150ms before stimulus onset to 750ms after stimulus onset. Trials  
236 containing movement-related artefacts were visually identified and excluded from all  
237 analyses. Blink and eye movement artifacts were identified and removed using  
238 Independent Components Analysis (ICA) and visual inspection of the resulting  
239 components. To increase the signal-to-noise ratio of the classification analyses (Carlson,  
240 Tovar, Alink, & Kriegeskorte, 2013), the data was downsampled to 100Hz.

#### 241 *2.5 EEG classification procedure*

242 Multivariate classification analyses were carried out in MATLAB using the  
243 CoSMoMVPA toolbox (Oosterhof, Connolly, & Haxby, 2016). Classification was performed  
244 separately for each 10ms time bin, resulting in classification time courses with 10 ms  
245 resolution. The analysis was performed pairwise, for all possible combinations of the six  
246 objects appearing in the two locations. Linear discriminant analysis (LDA) classifiers were  
247 always trained and tested on data from two conditions (e.g., an airplane in the upper  
248 visual field versus a carpet in the lower visual field), using a leave-one-out partitioning  
249 scheme (Figure 2B). The training set consisted of all but one trials for each of the two  
250 conditions, while one trial for each of the two conditions was held back and used for  
251 classifier testing. This procedure was repeated until every trial was left out once. Classifier

252 performance was averaged across these repetitions. The pairwise decoding analysis  
253 resulted in 12-by-12 matrix of decoding accuracies at each time point (reflecting all  
254 comparisons between the six objects appearing in the two locations) (Figure 2C).

#### 255 *2.6 Overall classification dynamics*

256 To assess the overall classification dynamics over time, we computed the general  
257 discriminability of the twelve different conditions. All pairwise classification accuracies  
258 were averaged, revealing a time course of object decoding independently of the  
259 positional regularities. This time course of overall classification accuracy was used to  
260 define time points of interest at the peaks of the classification time series, where  
261 classification performance was particularly pronounced. Using a “region of interest” logic  
262 frequently applied in fMRI analyses (Poldrack, 2007), we used these peaks as “time points  
263 of interest” to increase the detection power of subsequent analyses.

#### 264 *2.7 Object classification in typical and atypical locations*

265 To determine an effect of positional regularity on object decoding, we compared  
266 performance when classifying among typically positioned objects versus among atypically  
267 positioned objects. Pairwise classification accuracies were averaged for all comparisons  
268 between typically positioned objects (e.g., an airplane in the upper visual field versus a  
269 shoe in the lower visual field) and for all comparisons between atypically positioned  
270 objects (e.g., a shoe in the upper visual field versus an airplane in the lower visual field)  
271 (Figure 2C). Subsequently, the two resulting classification time series (for typically and  
272 atypically positioned objects) were compared. To increase the statistical power of this  
273 comparison, we specifically focused on the effect of positional regularity at the peaks in  
274 overall classification.

#### 275 *2.8 Sensor-space searchlight analysis*

276 To investigate which sensors contributed most to the observed effects, we  
277 performed a sensor-space searchlight analysis. For this analysis, the pairwise classification  
278 procedure was repeated for neighborhoods of seven adjacent electrodes around each  
279 individual electrode; the resulting classification accuracy was then mapped onto a scalp  
280 representation. This procedure allowed us to infer the approximate spatial distribution of  
281 classification differences between typically and atypically positioned objects. As for one  
282 participant only data from 32 electrodes was available, this participant was not included  
283 in the searchlight analysis.

#### 284 2.9 Statistical testing

285 Statistical testing was done across participants. To identify significant effects  
286 across time we used a threshold-free cluster-enhancement procedure (Smith & Nichols,  
287 2009) with default parameters. Multiple comparison correction was based on a sign-  
288 permutation test (with null distributions created from 10,000 bootstrapping iterations) as  
289 implemented in CoSMoMVPA (Oosterhof et al., 2016). The resulting statistical maps were  
290 thresholded at  $Z > 1.96$  (i.e.,  $p < .05$ ). The same procedure was employed for identifying  
291 significant sites across electrodes in the sensor-space searchlight analysis. For assessing  
292 the significance of effects at the overall classification peaks, repeated-measures ANOVAs  
293 and paired t-tests were performed. For these tests, we also computed effect size  
294 measures: partial  $\eta^2$  for ANOVAs and Cohen's  $d$  for t-tests. Additionally, for t-tests, scaled-  
295 information Bayes factors ( $BF$ ) were calculated as an additional measure of evidential  
296 value (Rouder, Speckman, Sun, Morey, & Iverson, 2009), where Bayes factors  $>10$  can be  
297 considered strong evidence for an effect.

## 298 **3 Results**

### 299 *3.1 Temporal dynamics of pairwise object classification*

300 In a first step, we characterized the overall response dynamics observed in the  
301 pairwise classification analysis, which allowed us to restrict subsequent analyses to time  
302 points where classification performance was particularly pronounced. For this, we  
303 computed an overall measure of pairwise classification by averaging across all unique off-  
304 diagonal elements of the pairwise classification matrices (Figure 2C), resulting in a single  
305 classification time series. This analysis revealed robust above-chance classification  
306 starting from 70 ms after stimulus onset and prominently peaking at 140 ms and 220 ms  
307 (Figure 3A). These two clear peaks in the classification time series were used as time  
308 points of interest for subsequent analyses, as we reasoned that differences between  
309 typically and atypically positioned objects would be most pronounced at time points at  
310 which objects were most discriminable.

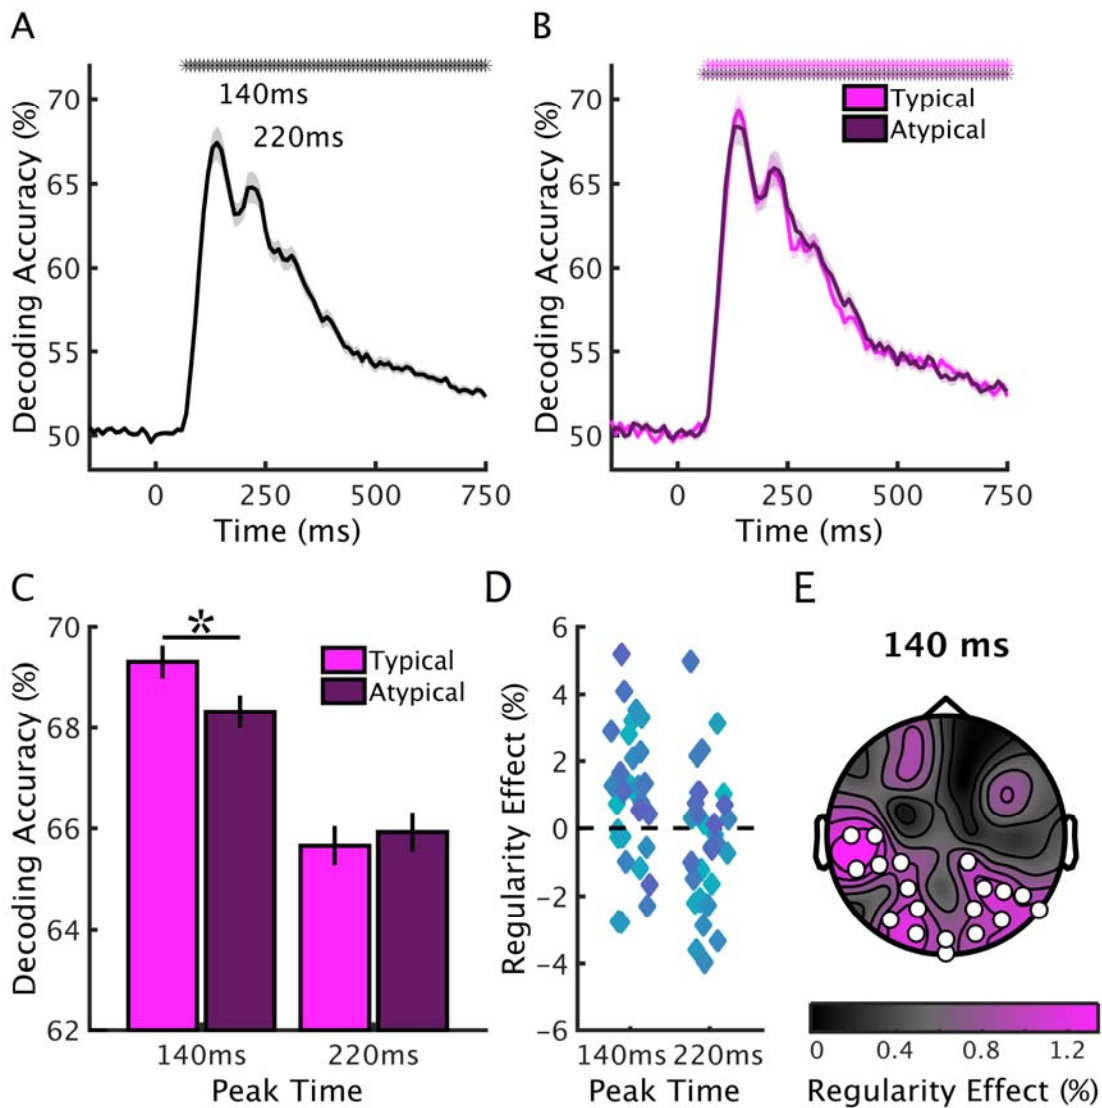

311

312 **Figure 3.** Classification Results. A) Overall pairwise classification performance was  
313 computed by averaging all pairwise decoding time series, revealing significant decoding  
314 accuracy starting at 70 ms after stimulus onset and peaking at 140 ms and 220 ms.  
315 Asterisks above data curves indicate above-chance classification ( $p < .05$ , corrected for  
316 multiple comparisons). The shaded margin reflects standard errors of the mean. B)  
317 Classification time series for typically and atypically positioned objects were computed by  
318 averaging all pairwise classification time series comparing typically and atypically  
319 positioned objects, respectively. Classification of typically and atypically positioned pairs  
320 showed comparable temporal dynamics, both peaking at the time points identified in the



321 overall decoding. Asterisks indicate above-chance classification ( $p < .05$ , corrected for  
322 multiple comparisons). The shaded margins reflect standard errors of the mean. C) At the  
323 first decoding peak (140 ms), but not the second peak (220 ms), classification was more  
324 accurate for typically than for atypically positioned objects. The asterisk indicates a  
325 significant difference ( $p < .05$ ). Error bars reflect standard errors of the difference. D)  
326 Scatterplots showing the regularity effects across participants, for both peak times. E) A  
327 sensor-space classification searchlight revealed that the regularity effect (difference  
328 between the classification of typically and atypically positioned objects) at the 140 ms  
329 peak is most pronounced in occipital and temporal electrodes. Circles indicate electrodes  
330 exhibiting a significant regularity effect ( $p < .05$ , corrected for multiple comparisons).

331

### 332 *3.2 Classification of objects when positioned typically and atypically*

333 To test whether neural representations differ for typically and atypically  
334 positioned objects, we compared classification performance for all typically and all  
335 atypically positioned objects. We averaged all pairwise classification time courses that  
336 corresponded to comparisons within regular pairs (e.g., an airplane in the upper visual  
337 field versus a boat in the lower visual field) and comparisons within irregular pairs (e.g.,  
338 an airplane in the lower visual field versus a boat in the upper visual field) (Figure 3B). The  
339 classification time series for typically and atypically positioned objects showed a similar  
340 temporal structure and both replicated the peak structure observed in the overall  
341 decoding, allowing for a meaningful comparison between typically and atypically  
342 positioned objects at the classification peaks. We thus restricted statistical comparisons  
343 to two time points of interest: the peak times observed in the overall decoding (140 ms  
344 and 220 ms). For the early peak at 140ms, we found higher classification accuracy for

345 typically than for atypically positioned objects,  $t(33) = 3.04$ ,  $p = .005$ ,  $d = 0.52$ ,  $BF = 12.06$ ,  
346 while for the later peak at 220ms, no such difference emerged,  $t(33) = 0.69$ ,  $p = .495$ ,  $d =$   
347  $0.12$ ,  $BF = 3.37$ , interaction with peak time,  $F(1,33) = 7.44$ ,  $p = .010$ ,  $\eta^2 = 0.18$  (Figure 3C).  
348 This pattern of results suggests that earlier stages of object processing (as reflected in  
349 the decoding peak at 140 ms) benefit from typical object locations, while relatively later  
350 object representations (at 220 ms after stimulus onset) are not sensitive to positional  
351 regularities. This result was replicated in a bootstrapping analysis, where we used  
352 independent sub-groups of participants to define peak times and compute the regularity  
353 effects (see Supplementary Information, Fig. S1).

354 To estimate the spatial extent of the early regularity effect, we performed a  
355 searchlight analysis in sensor space. We repeatedly performed the pairwise classification  
356 analysis for neighborhoods of seven adjacent sensors, using only data from the early  
357 peak at 140 ms. To quantify the regularity benefit, we then computed the difference  
358 between all pairwise comparisons of typically positioned objects and all pairwise  
359 comparisons of atypically positioned objects at every sensor location. This analysis  
360 revealed a significant regularity effect in posterior and lateral electrodes (19 significant  
361 electrode sites) (Figure 3D). This result provides an indication of the tentative cortical  
362 source of the regularity effect (within the limits of the restricted spatial resolution of EEG  
363 measurements), suggesting that the enhanced classification for regularly positioned  
364 objects may originate from visual areas of the occipital and temporal cortices.

365 These results also provide a control for oculomotor influences on our findings. If  
366 differential eye-movement patterns were driving the enhanced decoding for typically  
367 positioned objects, the effect should be observed in frontal electrodes, too. The absence  
368 of a regularity benefit in the frontal electrodes thus provides evidence against eye-

369 movement confounds. Two additional control analyses focused on spatiotemporal  
370 response patterns in selected frontal electrodes (see Supplementary Information, Fig.  
371 S3); these analyses confirmed the absence of an effect, further rendering eye-movement  
372 confounds unlikely.

### 373 *3.3 Classification within and between locations*

374 Our classification approach collapsed across pairwise comparisons within the  
375 same location and between different locations, so that classifiers could rely on  
376 information from both an object's identity and its location. Therefore, the classification  
377 benefit for typically positioned objects could, in principle, also emerge from a more  
378 thorough coding of an object's location. For example, classifiers – in principle – only need  
379 to predict the object's location to correctly classify a lamp in the upper visual field versus  
380 a shoe in the lower visual field. By contrast, to correctly classify a lamp in the upper visual  
381 field versus a hat in the upper visual field, classifiers need to use information about the  
382 object. Note that both these comparisons contributed to the classification accuracy of  
383 regularly positioned objects in the previous analysis.

384 To test whether a regularity benefit emerges also in situations where classification  
385 solely depends on object information, we thus looked at the regularity effect for all  
386 comparisons between locations (e.g., an airplane in the upper visual field versus a shoe in  
387 the lower visual field) (Figure 4A) and all comparisons within location (e.g., an airplane in  
388 the upper visual field versus a hat in the upper visual field) (Figure 4B). If typical  
389 positioning enhances location information, a regularity effect should only be found when  
390 comparing objects between different locations, but not within a specific location (when  
391 location information is eliminated). Finding comparable effects in the within- and

392 between-location comparisons would not support this view, indicating that typical  
393 positioning can also enhance processing when only object information is diagnostic.

394 We found a main effect of visual field comparison,  $F(1,33) = 365.70, p < .001, \eta^2 =$   
395  $0.91$ , with higher classification accuracies for classifying between locations (where the  
396 classifier can use the stimulus' location) than within location (where the classifier has no  
397 location information available), and an interaction of the within-between comparison and  
398 peak latency,  $F(1,33) = 72.30, p < .001, \eta^2 = 0.69$ , with a relatively more pronounced early  
399 peak when classifying between locations. Replicating our previous results, the analysis  
400 produced a significant peak X regularity interaction,  $F(1,33) = 9.83, p = .004, \eta^2 = 0.23$ , with  
401 a regularity benefit at the 140 ms peak,  $t(33) = 3.15, p = .004, d = 0.54, BF = 15.52$ , but not  
402 the 220 ms peak,  $t(33) = 1.05, p = .301, d = 0.18, BF = 2.50$ . Crucially, this pattern of results  
403 did not depend on the type of classification (between locations versus within location),  
404  $F(1,33) = 2.53, p = .121, \eta^2 = 0.07$ . These results do not provide evidence for a boost of  
405 location information, thus suggesting that typical real-world locations enhance visual  
406 processing by boosting object identity information.

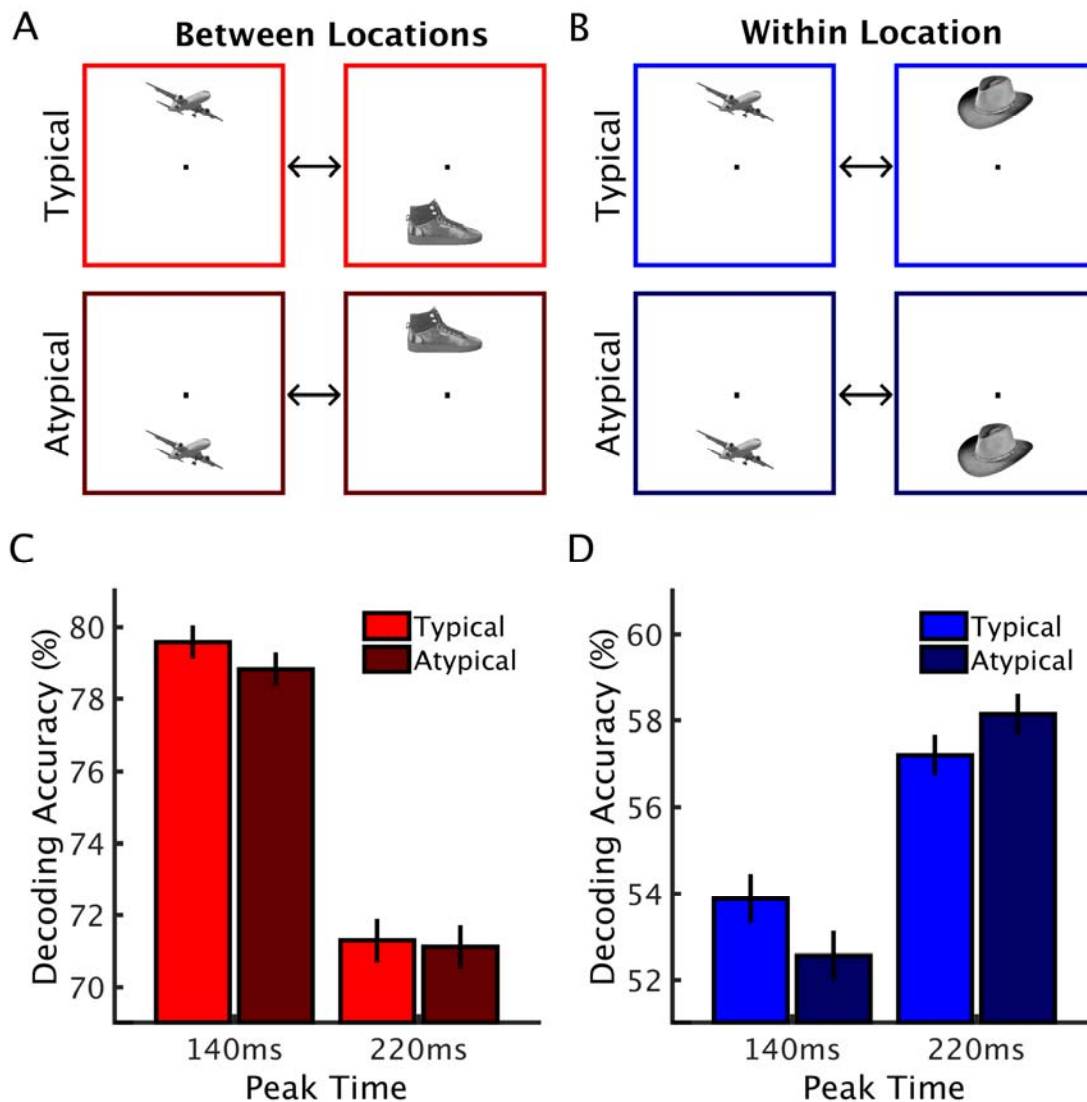

407

408 **Figure 4.** Between-Locations versus Within-Location Classification. We compared peak  
409 decoding for typically and atypically positioned objects separately for comparisons  
410 between different locations (e.g., an airplane in the upper visual field versus a shoe in the  
411 lower visual field) (A) and within the same location (e.g., an airplane in the upper visual  
412 field versus a hat in the upper visual field) (B). For both comparison types, we found a  
413 similar pattern (C, D) with a benefit for typically positioned objects at the 140 ms peak.  
414 Importantly, the patterns of results for between-locations and within-location  
415 classification were statistically indistinguishable (see Results). Error bars reflect standard  
416 errors.

## 417 **4 Discussion**

### 418 *4.1 Summary*

419 Here, we demonstrate that positional regularities contained in real-world scenes  
420 impact brain responses to individual objects. Using multivariate classification of EEG data,  
421 we show that object coding across the visual field is affected by the typical real-world  
422 location of the object. When objects are presented in frequently experienced locations,  
423 EEG response patterns at 140 ms after stimulus onset are better discriminable than when  
424 the same objects are presented in atypical locations. This early regularity benefit yielded a  
425 robust effect size of  $d = 0.52$ , and was consistent across subsets of participants (see  
426 Supplementary Information). Interestingly, the advantage for typically positioned objects  
427 was equally pronounced for classification between locations and within the same  
428 location, suggesting that typical positioning boosts object identity information, rather  
429 than location information. Using a sensor-space searchlight analysis, we characterize the  
430 effect in sensor space, where its most prominent emergence in posterior sensors  
431 suggests that typically positioned objects gain an advantage during early perceptual  
432 processing.

### 433 *4.2 Retinotopic priors as a consequence of natural scene structure*

434 How does this retinotopically specific processing benefit emerge from the  
435 structure of natural environments? An intuitively appealing explanation lies in the  
436 interplay of typical within-scene object locations and gaze patterns during natural  
437 viewing. When objects repeatedly occupy specific locations within a scene, they may  
438 repeatedly fall into similar parts of the visual field, thereby shaping visual tuning  
439 properties. For instance, as lamps mostly appear in the “upper” part of a scene, fixations  
440 likely more often land below a lamp than above a lamp. Previous eye-tracking studies can

441 provide some evidence for such a relationship between within-scene locations and  
442 retinotopic locations in limited experimental contexts: e.g., when walking along a  
443 corridor, lamps most often fall in the upper visual field (Turano et al., 2003). However,  
444 gaze patterns in real-world situations are complex and vary as a function of task context  
445 (Hayhoe & Ballard, 2005; Land, 2009), making it hard to establish a comprehensive  
446 characterization of this relationship. Future large-scale studies that investigate viewing  
447 patterns under naturalistic viewing conditions are thus required to empirically establish  
448 the connection between typical within-scene locations and typical retinotopic locations  
449 with high ecological validity. Without such studies, the association between typical  
450 within-scene locations and retinotopic priors – although intuitively compelling – needs to  
451 remain somewhat speculative.

#### 452 *4.3 Early stages of object coding are sensitive to typical locations*

453 Our findings demonstrate that visual processing channels are preferentially tuned  
454 to specific objects appearing in specific retinotopic locations (Kaiser & Haselhuhn, 2017;  
455 Kravitz et al., 2008). Crucially, our EEG classification approach allowed us to pinpoint the  
456 latency of this regularity benefit: We demonstrate that object processing at 140 ms after  
457 stimulus onset is affected by positional regularity. The timing of the effect suggests that  
458 objects appearing in typical visual field locations gain an advantage during early,  
459 perceptual processing, rather than through top-down interactions (e.g., via long-range  
460 feedback from frontal areas); previous M/EEG studies have suggested that such feedback  
461 processes impact visual responses only at later stages, starting shortly before 200 ms  
462 (Bar et al., 2006; Fahrenfort, van Leeuwen, Olivers, & Hogendoorn, 2017). As opposed to  
463 the difference in early object processing, later representations (at 220 ms after stimulus  
464 onset) do not depend on the location of the object. This result concurs with the

465 increasing location tolerance over the time course of object classification, peaking at  
466 around 180 ms (Isik et al., 2014), mirroring the increase in receptive field size along the  
467 visual stream (Kravitz, Saleem, Baker, Ungerleider, & Mishkin, 2013).

468 Can the sensitivity to positional regularity be interpreted as a processing  
469 advantage for typically positioned objects? Or do the results rather reflect a processing  
470 disadvantage for atypically positioned objects? Alternatively, there might be both an  
471 experience-based advantage for typically positioned objects, and a disadvantage for  
472 atypically positioned objects, caused by a lack of such experience? Our design cannot  
473 conclusively disambiguate these possibilities, as it relies on relative effects (i.e.,  
474 comparing typical and atypical positioning). In the Supplementary Information, we  
475 however provide indirect evidence by analyzing individual-object effects: decoding of  
476 typically positioned objects increases when the object has a stronger location prior, while  
477 the decoding of atypically positioned objects does not vary as a function of the prior  
478 strength (Fig. S2). Although these results provide tentative evidence for a processing  
479 advantage for typically positioned objects (rather than a disadvantage for atypically  
480 positioned objects), future investigations need to test the different interpretations more  
481 explicitly, for example by including objects that are not associated with specific locations.

#### 482 *4.4 Visual versus categorical sources of the regularity benefit*

483 What is the content of the location-specific object representations emerging at  
484 140 ms? Peaks in the M/EEG decoding in this time range have been previously associated  
485 with visual category processing in object-selective cortex (Cichy, Pantazis, & Oliva, 2014,  
486 2016; Carlson et al., 2013). Our searchlight analysis reveals the strongest regularity effect  
487 over lateral occipital and temporal electrode sites, suggesting that the effect originates  
488 from object-selective visual cortex. Whether processing differences in these object-



489 selective regions reflect genuine category processing differences or whether they reflect  
490 differential coding of category-associated visual features is a debated question (Bracci,  
491 Ritchie, & op de Beeck, 2017; Peelen & Downing, 2017). While some data suggest that  
492 visual properties explain most of the variance in object-selective responses (e.g., Baldassi  
493 et al., 2013), a recent MEG decoding study has demonstrated category-selective, rather  
494 than visually (shape-) driven, responses from as early as 130 ms after stimulus onset  
495 (Kaiser, Azzalini, & Peelen, 2016). To determine if the regularity benefit observed here can  
496 be linked to differences in the processing of particular visual features or true categorical  
497 processing differences, future studies need to employ stimuli that vary more extensively  
498 in their visual characteristics.

#### 499 *4.5 Positional structures beyond person perception*

500 Positional regularities have been studied in humans and non-human primates  
501 largely in the context of face and body perception, where parts are arranged in highly  
502 predictable configurations (e.g., the features of a human face). fMRI studies in humans  
503 have demonstrated that individual face and body parts are processed more efficiently  
504 when they appear in typical visual field locations (Chan et al., 2010; de Haas et al., 2016).  
505 Single-cell recordings in monkeys demonstrated that location biases can impact cortical  
506 responses to face parts as early as 100 ms after stimulus onset (Issa & DiCarlo, 2012),  
507 suggesting a benefit at early stages of perceptual processing.

508 Our results complement these findings by showing that such location-specific  
509 object processing is not restricted to the face/body domain: The inherent structure of  
510 natural scenes can similarly impact early processing (140 ms after stimulus onset) of  
511 object information across the visual field. Our findings thus highlight that location-specific  
512 tuning in object processing may form a general principle that shapes visual processing

513 mechanisms for spatially predictable information. Future research could test whether  
514 regularity structures also affect other domains where the visual input consists of multiple  
515 parts that are constrained by spatial regularities. For example, through extensive  
516 experience with reading written text, the neural mechanisms for perceiving letters could  
517 get tuned to their typical spatial locations within words (Kaiser & Haselhuhn, 2017;  
518 Vinckier et al., 2007).

#### 519 *4.6 Positional structures in multiple and individual objects*

520 Natural environments contain positional regularities on different levels, both on  
521 the levels of multiple (e.g., a lamps typically hang above tables) and individual objects  
522 (e.g., a lamp is typically in the upper visual field). Previous research has primarily focused  
523 on the latter: Recent behavioral studies have demonstrated that regularity structures in  
524 multi-object arrangement facilitate behavior in capacity-limited visual tasks (Gronau &  
525 Shachar, 2014; Kaiser et al., 2014; Kaiser, Stein, & Peelen, 2015; Stein, Kaiser, & Peelen,  
526 2015), and neuroimaging studies demonstrated that they enable the brain to integrate  
527 information across objects that appear in frequently experienced arrangements (Baeck,  
528 Wagemans, & Op de Beeck, 2013; Kaiser & Peelen, 2018; Kaiser et al., 2014).

529 Here, we provide the first evidence that typical regularity structures also impact  
530 the neural representation of individual objects. Our finding thus raises the question  
531 whether the previously reported regularity effects in multi-object perception can be  
532 reduced to the effects of typical individual object location. On a behavioral level, some  
533 previous studies oppose this notion by demonstrating that the benefits of multi-object  
534 regularities cannot be explained by the relative location of the constituent objects (Kaiser  
535 et al., 2014, 2015; Stein et al., 2015). Although these results suggest that positional  
536 regularities in multi-object and single-object processing offer complementary benefits,

537 further research is needed. Future studies will need to systematically manipulate  
538 positional structures on different levels (from individual objects to multi-object  
539 arrangements) to explore how regularities on multiple levels interact on a neural level.

#### 540 *4.7 Object processing in the context of natural scenes*

541 A major challenge for the visual system when processing natural scenes is the  
542 large number of individual objects they contain. Surprisingly, however, objects can be  
543 rapidly decoded from MEG activity patterns, even when embedded in complex scenes  
544 (Brandman & Peelen, 2017; Kaiser, Oosterhof, & Peelen, 2016). Previous  
545 electrophysiological studies have investigated how congruent scene context can  
546 facilitate cortical processing of an object. Several studies have shown that semantic  
547 consistencies (i.e., whether the object is associated with the scene) affect EEG  
548 waveforms starting from around 300 ms (Ganis & Kutas, 2003; Mudrik, Lamy, & Deouell,  
549 2010; Mudrik, Shalgi, Lamy, & Deouell, 2014; Vő & Wolfe, 2013). More similarly to our  
550 study, others have investigated the effects of syntactic consistencies (i.e., whether the  
551 object is placed in its typical within-scene location), and found comparably late effects,  
552 most prominently between 400 and 600 ms (Demiral, Malcolm, & Henderson, 2012; Vő &  
553 Wolfe, 2013). Such effects of syntactic consistencies have been linked to efficient  
554 behavioral performance in complex multi-object scenes (Draschkow & Vő, 2017).

555 How can the early effect observed here be reconciled with the late effects found  
556 for typical object placement within a scene? Studies on object-scene consistencies differ  
557 in two important ways from our study. First, in these studies participants are cued to look  
558 at the object's location within the scene, whereby retinotopic object location is  
559 purposefully eliminated. Second, these studies measure overall waveform changes  
560 between congruent and incongruent conditions, which may reflect more general, post-

561 perceptual signatures of consistency processing or object-scene interaction. By contrast,  
562 our analysis used highly sensitive decoding methods to explicitly focus on object  
563 discriminability within typically and atypically positioned objects, so that our results are  
564 best understood as a rapid signature of experience-based tuning of the visual  
565 architecture. Our findings and the findings of these previous studies thus highlight  
566 different facets of the processing of regularly structured environments, where both the  
567 early effects of typical retinotopic locations and the later effects of typical within-scene  
568 positioning may contribute to efficient real-world perception.

#### 569 *4.8 Conclusion*

570 Together, our results demonstrate a general principle of object coding in human  
571 visual cortex: Information about an object's location and its identity are processed  
572 interactively, where objects appearing in their typical retinotopic locations are more  
573 efficiently coded than objects appearing in atypical retinotopic locations. This processing  
574 advantage manifests in object decoding 140 ms after stimulus onset, suggesting that  
575 early object representations are tied to the object's extensively experienced visual-field  
576 location. This finding can provide a novel explanation for the efficient parsing of complex  
577 real-world environments, which contain large numbers of typically positioned objects.

578

579 **Acknowledgements**

580 The research was supported by a DFG Emmy-Noether Grant awarded to R.M.C. (CI241-1/1).

581 **References**

- 582 Baeck, A., Wagemans, J., & Op de Beeck, H. P. (2013). The distributed representation of  
583 random and meaningful object pairs in human occipitotemporal cortex: the  
584 weighted average as a general rule. *Neuroimage*, 70, 37-47.
- 585 Baldassi, C., Alemi-Neissi, A., Pagan, M., DiCarlo, J. J., Zecchina, R., & Zoccolan, D. (2013).  
586 Shape similarity, better than semantic membership, accounts for the structure of  
587 visual object representations in a population of monkey inferotemporal neurons.  
588 *PLoS Computational Biology*, 9, e1003167.
- 589 Bar, M. (2004). Visual objects in context. *Nature Reviews Neuroscience*, 5, 617-629.
- 590 Bar, M., Kassam, K. S., Ghuman, A. S., Boshyan, J., Schmid, A. M., Dale, A. M., Hämäläinen,  
591 M. S., Marinkovic, K., Schacter, D. L., Rosen, B. R., & Halgren, E. (2006). Top-down  
592 facilitation of visual recognition. *Proceedings of the National Academy of Sciences*,  
593 *U.S.A.*, 103, 449-454.
- 594 Biederman, I., Mezzanotte, R. J., & Rabinowitz, J. C. (1982). Scene perception: detecting  
595 and judging objects undergoing relational violations. *Cognitive Psychology*, 14, 143-  
596 177.
- 597 Bracci, S., Ritchie, J. B., & op de Beeck, H. P. (2017). On the partnership between neural  
598 representations of object categories and visual features in the ventral visual  
599 pathway. *Neuropsychologia*, 105, 153-164.
- 600 Brainard, D. H. (1997). The psychophysics toolbox. *Spatial Vision*, 10, 433-436.
- 601 Brandman, T., & Peelen, M. V. (2017). Interaction between scene and object processing  
602 revealed by human fMRI and MEG decoding. *Journal of Neuroscience*, 37, 7700-  
603 7710.

- 604 Carlson, T. A., Hogendoorn, H., Kanai, R., Mesik, J., & Turret, J. (2011). High temporal  
605 resolution decoding of object position and category. *Journal of Vision*, 11, 9.
- 606 Carlson, T. A., Tovar D. A., Alink, A., & Kriegeskorte, N. (2013). Representational dynamics  
607 of object vision: the first 1000 ms. *Journal of Vision*, 13, 1-19.
- 608 Chan, A. W., Kravitz, D. J., Truong, S., Arizpe, J., & Baker, C.I. (2010). Cortical  
609 representations of bodies and faces are strongest in commonly experienced  
610 configurations. *Nature Neuroscience*, 13, 417-418.
- 611 Chun, M. M. (2000). Contextual cueing of visual attention. *Trends in Cognitive Sciences*, 4,  
612 170-178.
- 613 Cichy, R. M., Chen, Y., & Haynes, J. D. (2011). Encoding the identity and location of objects  
614 in human LOC. *Neuroimage*, 54, 2297-2307.
- 615 Cichy, R. M., Pantazis, D., & Oliva, A. (2014). Resolving human object recognition in space  
616 and time. *Nature Neuroscience*, 17, 455-462.
- 617 Cichy, R. M., Pantazis, D., & Oliva, A. (2016). Similarity-based fusion of MEG and fMRI  
618 reveals spatio-temporal dynamics in human cortex during visual object  
619 recognition. *Cerebral Cortex*, 26, 3563-3579.
- 620 Contini, E. W., Wardle, S. G., & Carlson, T. A. (2017). Decoding the time-course of object  
621 recognition in the human brain: From visual features to categorical decisions.  
622 *Neuropsychologia*, 105, 165-176.
- 623 de Haas, B., Schwarzkopf, D. S., Alvarez, I., Lawson, R. P., Henriksson, L., Kriegeskorte, N.,  
624 & Rees, G. (2016). Perception and processing of faces in the human brain is tuned  
625 to typical facial feature locations. *Journal of Neuroscience*, 36, 9289-9302.

- 626 Demiral, S. B., Malcolm, G. L., & Henderson, J. M. (2012). ERP correlates of spatially  
627 incongruent object identification during scene viewing: contextual expectancy  
628 versus simultaneous processing. *Neuropsychologia*, 50, 1271-1285.
- 629 Draschkow, D., & Võ, M. L.-H. (2017). Scene grammar shapes the way we interact with  
630 objects, strengthens memories, and speeds search. *Scientific Reports*, 7, 16471.
- 631 Fahrenfort, J. J., van Leeuwen, J., Olivers, C. N. L., & Hogendoorn, H. (2017). Perceptual  
632 integration without conscious access. *Proceedings of the National Academy of  
633 Sciences, U.S.A.*, 114, 3744-3749.
- 634 Ganis, G., & Kutas, M. (2003). An electrophysiological study of scene effects on object  
635 identification. *Cognitive Brain Research*, 16, 123-144.
- 636 Golomb, J. D., & Kanwisher, N. (2012). Higher level visual cortex represents retinotopic,  
637 not spatiotopic, object location. *Cerebral Cortex*, 22, 2794-2810.
- 638 Gronau, N., & Shachar, M. (2014). Contextual integration of visual objects necessitates  
639 attention. *Attention, Perception & Psychophysics*, 76, 695-714.
- 640 Hasson, U., Levy, I., Behrmann, M., Hendler, T., & Malach, R. (2002). Eccentricity bias as an  
641 organizing principle for human high-order object areas. *Neuron*, 34, 479-490.
- 642 Hayhoe, M., & Ballard, D. (2005). Eye movements in natural behavior. *Trends in Cognitive  
643 Sciences*, 9, 188-194.
- 644 Hemond, C. C., Kanwisher, N., & Op de Beeck, H. P. (2007). A preference for contralateral  
645 stimuli in human object- and face-selective cortex. *PLoS One*, 2, e574.
- 646 Henriksson, L., Mur, M., & Kriegeskorte, N. (2015). Faciotopy – A face-feature like  
647 topology in the human occipital face area. *Cortex*, 72, 156-167.



- 648 Hong, H, Yamins, D. L. K., Majaj, N. J., & DiCarlo, J. J. (2016). Explicit information for  
649 category-orthogonal object properties increases along the ventral visual stream.  
650 *Nature Neuroscience*, 19, 613-622.
- 651 Isik, L., Meyers, E. M., Leibo, J. Z., & Poggio, T. (2014). The dynamics of invariant object  
652 recognition in the human visual system. *Journal of Neurophysiology*, 111, 91-102.
- 653 Issa, E. B., & DiCarlo, J. J. (2012). Precedence of the eye region in neural processing of  
654 faces. *Journal of Neuroscience*, 32, 16666-16682.
- 655 Kaiser, D., Azzalini, D. C., & Peelen, M. V. (2016). Shape-independent object category  
656 responses revealed by MEG and fMRI decoding. *Journal of Neurophysiology*, 115,  
657 2246-2250.
- 658 Kaiser, D., & Haselhuhn, T. (2017). Facing a regular world: How spatial object structure  
659 shapes visual processing. *Journal of Neuroscience*, 37, 1965-1967.
- 660 Kaiser, D., Oosterhof, N. N., & Peelen, M. V. (2016). The neural dynamics of attentional  
661 selection in natural scenes. *Journal of Neuroscience*, 36, 10522-10528.
- 662 Kaiser, D., & Peelen, M. V. (2018). Transformation from independent to integrative coding  
663 of multi-object arrangements in human visual cortex. *Neuroimage*, 169, 334-341.
- 664 Kaiser, D., Stein, T., & Peelen, M. V. (2014). Object grouping based on real-world  
665 regularities facilitates perception by reducing competitive interactions in visual  
666 cortex. *Proceedings of the National Academy of Sciences, U.S.A.*, 111, 11217-11222.
- 667 Kaiser, D., Stein, T., & Peelen, M. V. (2015). Real-world spatial regularities affect visual  
668 working memory for objects. *Psychonomic Bulletin & Review*, 22, 1784-1790.
- 669 Kravitz, D. J., Kriegeskorte, N., & Baker, C. I. (2010). High-level visual object  
670 representations are constrained by position. *Cerebral Cortex*, 20, 2916-2925.

- 671 Kravitz, D. J., Saleem, K. S., Baker, C. I., Ungerleider, L. G., & Mishkin, M. (2013). The  
672 ventral visual pathway: an expanded neural framework for the processing of  
673 object quality. *Trends in Cognitive Sciences*, 17, 26-49.
- 674 Kravitz, D. J., Vinson, L. D., & Baker, C. I. (2008). How position dependent is visual object  
675 recognition? *Trends in Cognitive Sciences*, 12, 114-122.
- 676 Land, M. F. (2009). Vision, eye movements, and natural behavior. *Visual Neuroscience*, 26,  
677 51-62.
- 678 Mudrik, L., Lamy, D., & Deouell, L. Y. (2010). ERP evidence for context congruity effects  
679 during simultaneous object-scene processing. *Neuropsychologia*, 48, 507-517.
- 680 Mudrik, L., Shalgi, L., Lamy, D., & Deouell, L. Y. (2010). ERP correlates of spatially  
681 incongruent object identification during scene viewing: contextual expectancy  
682 versus simultaneous processing. *Neuropsychologia*, 56, 447-458.
- 683 Oliva, A., & Torralba, A. (2007). The role of context in object recognition. *Trends in*  
684 *Cognitive Sciences*, 11, 520-527.
- 685 Oostenveld, R., Fries, P., Maris, E., & Schoffelen, J. M. (2011). Fieldtrip: open source  
686 software for advances analysis of MEG, EEG, and invasive electrophysiological  
687 data. *Computational Intelligence and Neuroscience*, 2011, 156869.
- 688 Oosterhof, N. N., Connolly, A. C., & Haxby, J. V. (2016). CoSMoMVPA: multi-modal  
689 multivariate pattern analysis of neuroimaging data in Matlab / GNU Octave.  
690 *Frontiers in Neuroinformatics*, 10, 20.
- 691 Peelen, M. V., & Downing, P. E. (2017) Category selectivity in human visual cortex: Beyond  
692 visual object recognition. *Neuropsychologia*, 105, 177-183.
- 693 Poldrack, R. A. (2007). Region of interest analysis for fMRI. *Social Cognitive and Affective*  
694 *Neuroscience*, 2, 67-70.

- 695 Rouder, J. N., Speckman, P. L., Sun, D., Morey, R. D., & Iverson, G. (2009). Bayesian t-tests  
696 for accepting and rejecting the null hypothesis. *Psychonomic Bulletin & Review*, *16*,  
697 225-237.
- 698 Russell, B. C., Torralba, A., Murphy, K. P., & Freeman, W. T. (2008). LabelMe: a database  
699 and web-based tool for image annotation. *International Journal of Computer Vision*,  
700 *77*, 157-173.
- 701 Schwarzlose, R. F., Swisher, J. D., Dang, S., & Kanwisher, N. (2008). The distribution of  
702 category and location information across object-selective regions in human visual  
703 cortex. *Proceedings of the National Academy of Sciences, U.S.A.*, *105*, 4447-4452.
- 704 Smith, S. M., & Nichols, T. E. (2009). Threshold-free cluster enhancement: addressing  
705 problems of smoothing, threshold dependence and localization in cluster  
706 interference. *Neuroimage*, *66*, 215-222.
- 707 Stein, T., Kaiser, D., & Peelen, M. V. (2015). Interobject grouping facilitates visual  
708 awareness. *Journal of Vision*, *15*, 10.
- 709 Turano, K. A., Gerguschat, D. R., & Baker, F. H. (2003). Oculomotor strategies for the  
710 direction of gaze tested with a real-world activity. *Vision Research*, *43*, 333-346.
- 711 Vinckier, F., Dehaene, S., Jobert, A., Dubus, J. P., Sigman, M., & Cohen, L. (2007).  
712 Hierarchical coding of letter strings in the ventral stream: dissecting the inner  
713 organization of the visual word-form system. *Neuron*, *55*, 143-156.
- 714 Võ, M. L.-H., & Wolfe, J. M. (2013). Differential ERP signatures elicited by semantic and  
715 syntactic processing in scenes. *Psychological Science*, *24*, 1816-1823.
- 716 Willenbockel, V., Sadr, J., Fiset, D., Horne, G. O., Gosselin, F., & Tanaka, J. W. (2010).  
717 Controlling low-level image properties: The SHINE toolbox. *Behavior Research*  
718 *Methods*, *42*, 671-684.

719 Wolfe, J. M., Võ, M. L.-H., Evans, K. K., & Greene, M. R. (2011). Visual search in scenes  
720 involves selective and nonselective pathways. *Trends in Cognitive Sciences*, 15, 77-  
721 84.
